# Supplementary material for: Hydrogel-Based Pre-Clinical Evaluation of Repurposed FDA-Approved Drugs for AML
Source: MDPI journal article supplement (doi:10.3390/ijms24044235), 2023-02-20
Supplement: s1 [file s1]

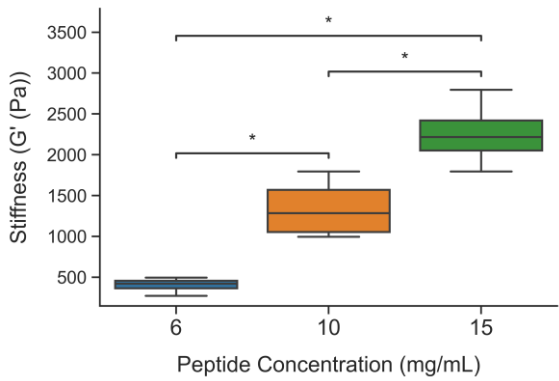

**Figure S1A. Stiffness (G') of peptide hydrogels of varying concentrations, assessed via bulk oscillatory rheology.** Results demonstrate a positive relationship between peptide concentration and stiffness (G'), and a significant difference in stiffness between peptide concentrations tested. (Independent t-test; n=4; \*: p < 0.05; \*\*: p < 0.01; \*\*\*: p < 0.001). The average stiffness of 6 mg/mL peptide hydrogels was 402 Pa. This is within the same range of stiffness previously reported for Matrigel® (400 - 420 Pa). Therefore, 6 mg/mL was selected as the concentration for this study.

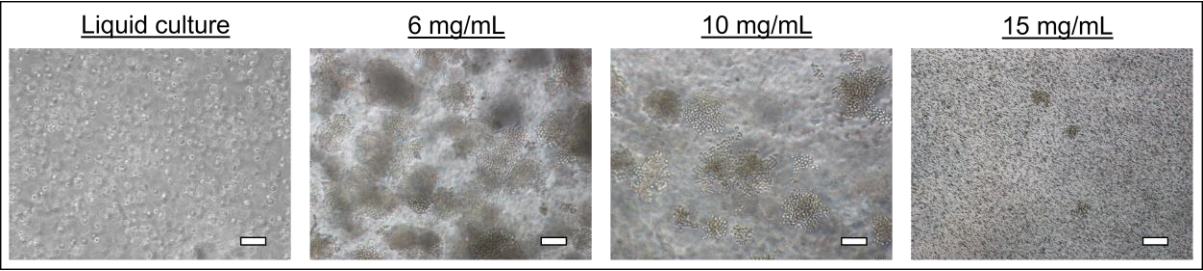

**Figure S1B. Representative phase contrast images of U937 cell growth in increasing concentration of peptide.** Images taken 7 days after initial seeding. Scale bars = 100 μm

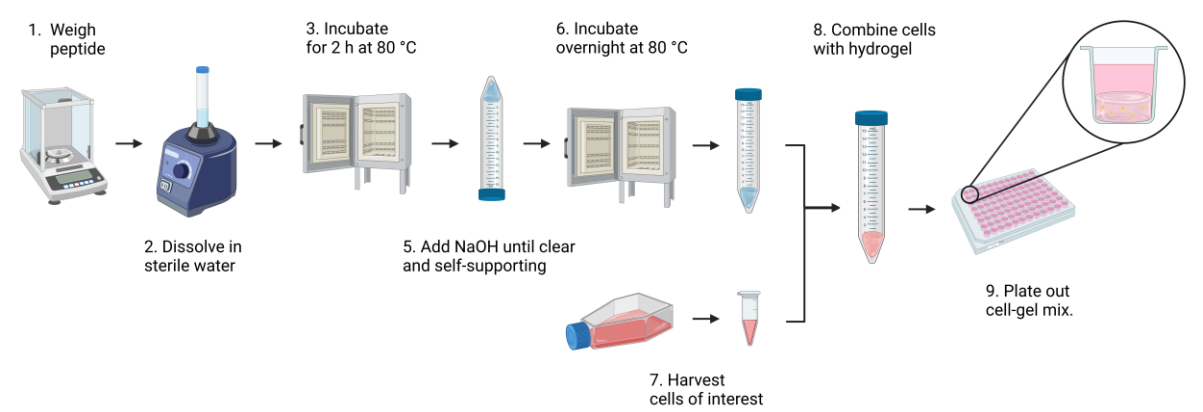

**Figure S2 – Schematic overview of the peptide hydrogel preparation and cell encapsulation process.**

**Table S1. AML patient sample diagnostic data**

| Sample ID | Age (years) | Sex    | FLT3 Status | NPM1 Status |
|-----------|-------------|--------|-------------|-------------|
| PB522     | 64          | Female | Wild type   | Wild type   |
| MJ694     | 69          | Male   | Wild Type   | Mutant      |
